# Supplementary material
Source: ML conference proceedings conference paper supplement (https://proceedings.mlr.press/v108/ye20a.html)
Supplement: Supplementary file [file ye20a-supp.pdf]

---

# Optimization of Graph Total Variation via Active-Set-based Combinatorial Reconditioning — Supplementary Material —

---

**Zhenzhang Ye**  
TU Munich  
zhenzhang.ye@tum.de

**Thomas Möllenhoff**  
TU Munich  
thomas.moellenhoff@tum.de

**Tao Wu**  
TU Munich  
tao.wu@tum.de

**Daniel Cremers**  
TU Munich  
cremers@tum.de

**Lemma 1.** *Let  $h$  be  $C^2$  with  $l_h I \preceq \nabla^2 h(\cdot) \preceq L_h I$  for some constants  $l_h, L_h > 0$ . Then the gradient descent on  $\min_x h(Ax + b)$  with step size  $1/t = 2/(L_h \sigma_{\max}(A)^2 + l_h \sigma_{\min>0}(A)^2)$  satisfies*

$$\|x^{k+1} - x^*\| \leq \frac{\varphi - 1}{\varphi + 1} \|x^k - x^*\|, \quad (1)$$

with  $\varphi = \kappa(A)^2 \cdot \kappa(h)$ ,  $\kappa(h) := L_h/l_h$ .

*Proof of Lemma 1.* Clearly  $t > (L_h \cdot \lambda_{\max}(A^\top A))/2$ , so classical theory guarantees  $x^k \rightarrow x^*$ . First note that

$$x^{k+1} - x^k = -\frac{1}{t} A^\top \nabla h(Ax^k + b) \in \text{ran } A^\top, \quad (2)$$

and consequently  $x^k - x^0 \in (\ker A)^\perp$ , also  $x^* - x^k \in (\ker A)^\perp$ . Inserting the gradient step for  $x^{k+1}$  yields

$$\|x^{k+1} - x^*\| = \|x^k - x^* - \frac{1}{t} A^\top (\nabla h(Ax^k + b) - \nabla h(Ax^* + b))\|. \quad (3)$$

From the mean value theorem it follows

$$\nabla h(Ax^k + b) - \nabla h(Ax^* + b) = M(Ax^k - Ax^*), \quad (4)$$

with  $M = \int_0^1 \nabla^2 h(Ax^* + b + \alpha(Ax^k - Ax^*)) d\alpha$ . Since  $l_h I \preceq \nabla^2 h(\cdot) \preceq L_h I$  we have  $l_h I \preceq M \preceq L_h I$ . This yields due to  $x^k - x^* \in (\ker A)^\perp$  that

$$\|x^{k+1} - x^*\| = \|(I - \frac{1}{t} A^\top M A)(x^k - x^*)\| \leq \max\{|1 - l_h \sigma_{\min>0}(A)^2/t|, |1 - L_h \sigma_{\max}(A)^2/t|\} \cdot \|x^k - x^*\|. \quad (5)$$

The choice  $t = (l_h \sigma_{\min>0}(A)^2 + L_h \sigma_{\max}(A)^2)/2$  minimizes the above rate and yields the desired result.  $\square$
